# Supplementary material for: Hyperprogression of a mismatch repair-deficient colon cancer in a humanized mouse model following administration of immune checkpoint inhibitor pembrolizumab
Source: PubMed Central journal article supplement (PMC8522841; doi:10.18632/oncotarget.28086), 2021-10-12
Supplement: oncotarget-12-2131-s001.pdf [file oncotarget-12-2131-s001.pdf]

## Hyperprogression of a mismatch repair-deficient colon cancer in a humanized mouse model following administration of immune checkpoint inhibitor pembrolizumab

### SUPPLEMENTARY MATERIALS

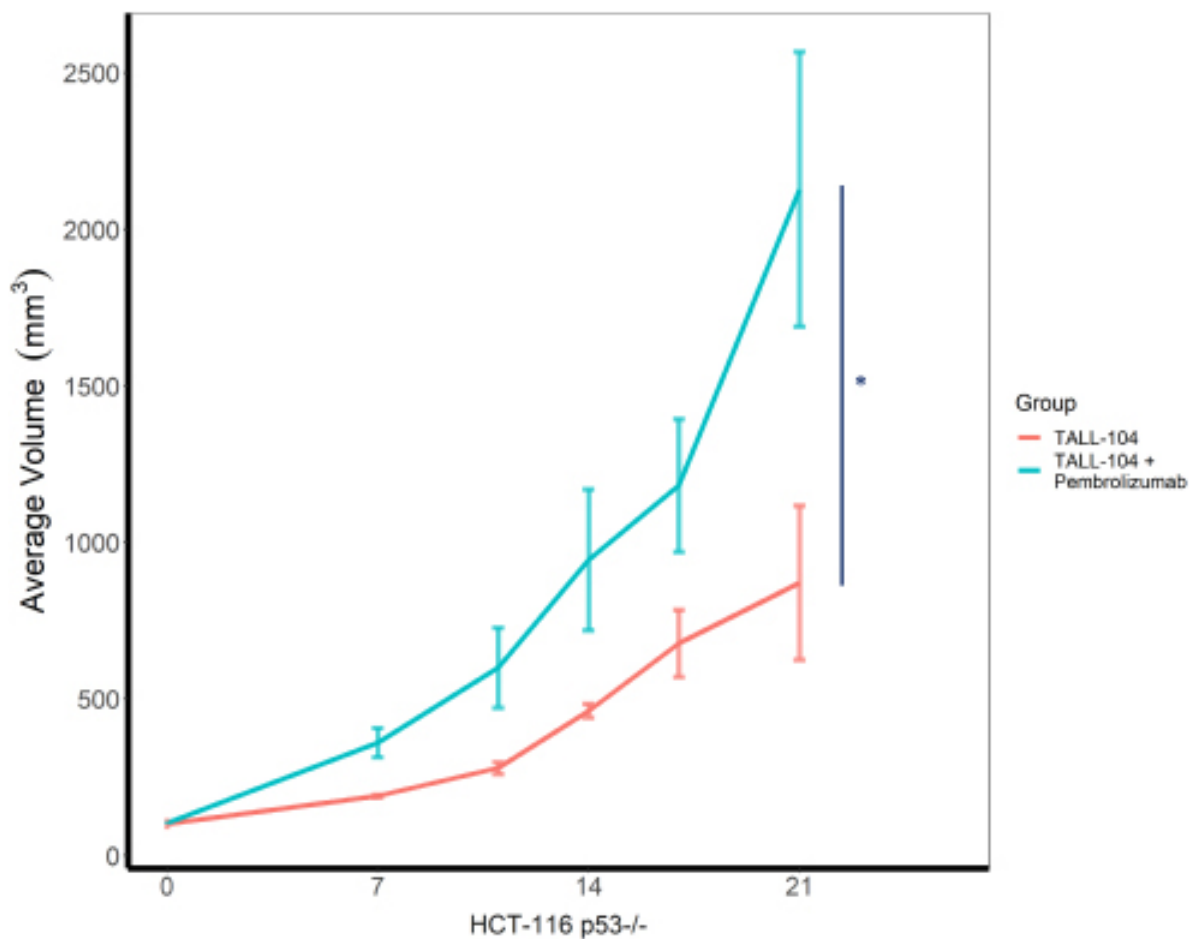

**Supplementary Figure 1: Independent experiment to reproduce HPD/HP phenotype in the humanized TALL-104 HCT-116 p53<sup>-/-</sup> model.** Tumor growth curve of selected humanized control and pembrolizumab treatment group conditions show the HPD/HP phenotype. For each group;  $n = 4$ , significance ( $P < 0.05$ ).
